# Supplementary material for: Activity of decitabine combined with all-trans retinoic acid in oligoblastic acute myeloid leukemia: results from a randomized 2x2 phase II trial (DECIDER)
Source: PubMed Central journal article supplement — Haematologica. 2023 Jan 5;108(8):2244–8. doi: 10.3324/haematol.2022.282258 (PMC10388266; doi:10.3324/haematol.2022.282258), 2023-01-05
Supplement: 2022_282258_RUMMELT_SUPPL.pdf [file 2022_282258_RUMMELT_SUPPL.pdf]

# Activity of decitabine combined with all-*trans* retinoic acid in oligoblastic acute myeloid leukemia: results from a randomized 2x2 phase II trial (DECIDER)

Christoph Rummelt,<sup>1</sup> Olga Grishina,<sup>2</sup> Claudia Schmoor,<sup>2</sup> Martina Crysandt,<sup>3</sup> Michael Heuser,<sup>4</sup> Katharina S. Götze,<sup>5,6</sup> Richard F. Schlenk,<sup>7,8,9</sup> Konstanze Döhner,<sup>7</sup> Helmut R. Salih,<sup>10</sup> Gerhard Heil,<sup>11</sup> Carsten Müller-Tidow,<sup>8,12,13</sup> Wolfram Brugger,<sup>14</sup> Andrea Kündgen,<sup>15,16</sup> Maïke de Wit,<sup>17</sup> Aristoteles Giagounidis,<sup>18</sup> Sebastian Scholl,<sup>19</sup> Andreas Neubauer,<sup>20</sup> Jürgen Krauter,<sup>21</sup> Gesine Bug,<sup>22,23</sup> Haifa Kathrin Al-Ali,<sup>24</sup> Ralph Wäsch,<sup>1</sup> Heiko Becker,<sup>1,25</sup> Annette M. May,<sup>26</sup> Justus Duyster,<sup>1,25</sup> Björn Hackanson,<sup>1,27</sup> Arnold Ganser,<sup>4</sup> Hartmut Döhner<sup>8</sup> and Michael Lübbert<sup>1</sup>

<sup>1</sup>Department of Hematology, Oncology and Stem Cell Transplantation, University Medical Center Freiburg, Faculty of Medicine, University of Freiburg, Freiburg; <sup>2</sup>Clinical Trials Unit, University Medical Center Freiburg, Faculty of Medicine, University of Freiburg, Freiburg; <sup>3</sup>Department of Hematology, Oncology, Hemostaseology and Stem Cell Transplantation, University Hospital RWTH Aachen University, Aachen;

<sup>4</sup>Department of Hematology, Hemostasis, Oncology and Stem Cell Transplantation, Hannover Medical School, Hannover; <sup>5</sup>Department of Medicine III, Technical University of Munich, Munich; <sup>6</sup>German Cancer Consortium (DKTK) and German Cancer Research Center (DKFZ), Partner Site Munich, München;

<sup>7</sup>Department of Internal Medicine III, University Hospital of Ulm, Ulm; <sup>8</sup>Department of Internal Medicine V, Heidelberg University Hospital, Heidelberg; <sup>9</sup>National Center of Tumor Diseases, NCT-Trial Center, German Cancer Research Center, Heidelberg;

<sup>10</sup>Clinical Collaboration Unit Translational Immunology, German Cancer Consortium (DKTK) and German Cancer Research Center (DKFZ), Partner Site Tübingen, Tübingen; <sup>11</sup>Department of Hematology/Oncology, Klinikum Luedenscheid, Luedenscheid; <sup>12</sup>German Cancer Consortium (DKTK) and German Cancer Research Center (DKFZ), Partner Site Heidelberg, Heidelberg; <sup>13</sup>Department of Medicine A, University Hospital of Münster, Münster;

<sup>14</sup>Department of Hematology, Hospital Villingen-Schwenningen, Villingen-Schwenningen; <sup>15</sup>Department of Hematology, Oncology and Clinical Immunology, Heinrich-Heine-University, Faculty of Medicine, Düsseldorf; <sup>16</sup>German Cancer Consortium (DKTK) and German Cancer Research Center (DKFZ), Partner Site Düsseldorf, Düsseldorf; <sup>17</sup>Department of Hematology and Oncology, Vivantes Klinikum Neukölln, Berlin;

<sup>18</sup>Clinic for Oncology, Hematology and Palliative Medicine, Marien-Hospital Düsseldorf, Düsseldorf; <sup>19</sup>Department of Hematology and Oncology, Universitätsklinikum Jena, Klinik für Innere Medizin II, Jena; <sup>20</sup>Department of Hematology and Oncology, University Clinic Gießen/Marburg, Marburg; <sup>21</sup>Department of Internal Medicine III, Städtisches Klinikum Braunschweig, Braunschweig;

<sup>22</sup>Department of Medicine II, Hematology and Oncology, University Hospital Frankfurt, Goethe University, Frankfurt; <sup>23</sup>German Cancer Consortium (DKTK) and German Cancer Research Center (DKFZ), Partner Site Frankfurt, Frankfurt; <sup>24</sup>Krukenberg Cancer Center, University Hospital Halle, Halle; <sup>25</sup>German Cancer Consortium (DKTK) and German Cancer Research Center (DKFZ), Partner Site Freiburg, Freiburg; <sup>26</sup>Institute for Surgical Pathology, University Medical Center Freiburg, Faculty of Medicine, University of Freiburg, Freiburg and <sup>27</sup>Department of Hematology/Oncology, Universitätsklinikum Augsburg, Augsburg, Germany

Correspondence:

M. LUEBBERT - michael.luebbert@uniklinik-freiburg.de

<https://doi.org/10.3324/haematol.2022.282258>

## Supplementary Table 1

| Variable                                                     | ATRA           | no ATRA         | Total           |
|--------------------------------------------------------------|----------------|-----------------|-----------------|
| <b>Patients</b>                                              |                |                 |                 |
| total (%)                                                    | 22 (39.3)      | 34 (60.7)       | 56              |
| <b>VPA</b>                                                   |                |                 |                 |
| No                                                           | C: 9 (40.9)    | A: 13 (38.2)    | 22 (39.3)       |
| Yes                                                          | D: 13 (59.1)   | B: 21 (61.8)    | 34 (60.7)       |
| <b>Sex</b>                                                   |                |                 |                 |
| female                                                       | 5 (22.7)       | 8 (23.5)        | 13 (23.2)       |
| male                                                         | 17 (77.3)      | 26 (76.5)       | 43 (76.8)       |
| <b>Age, years</b>                                            |                |                 |                 |
| Median (range)                                               | 75 (61-83)     | 73.5 (61-88)    | 75 (61-88)      |
| < 75yrs                                                      | 7 (31.8)       | 20 (58.8)       | 27 (48.2)       |
| >= 75yrs                                                     | 15 (68.2)      | 14 (41.2)       | 29 (51.8)       |
| <b>ECOG PS</b>                                               |                |                 |                 |
| 0                                                            | 7 (31.8)       | 13 (38.2)       | 20 (35.7)       |
| 1                                                            | 12 (54.6)      | 17 (50)         | 29 (51.8)       |
| 2-3                                                          | 3 (13.6)       | 4 (11.8)        | 7 (12.5)        |
| <b>Comorbidity index *</b>                                   |                |                 |                 |
| 0                                                            | 6 (27.3)       | 10 (29.4)       | 16 (28.6)       |
| 1-2                                                          | 7 (31.8)       | 6 (17.7)        | 13 (23.2)       |
| >= 3                                                         | 9 (40.9)       | 18 (52.9)       | 27 (48.2)       |
| <b>Prior hematologic</b>                                     |                |                 |                 |
| no                                                           | 8 (36.4)       | 10 (29.4)       | 18 (32.1)       |
| yes                                                          | 14 (63.6)      | 24 (70.6)       | 38 (67.9)       |
| <b>Treatment related</b>                                     |                |                 |                 |
| No                                                           | 19 (86.4)      | 31 (91.2)       | 50 (89.3)       |
| yes                                                          | 3 (13.6)       | 3 (8.8)         | 6 (10.7)        |
| Variable                                                     | ATRA           | No ATRA         | Total           |
| <b>WBC per <math>\mu</math>l **</b>                          |                |                 |                 |
| Median 1000/ $\mu$ L (range)                                 | 3.4 (0.5-52.6) | 2.75 (0.8-43.2) | 3.25 (0.5-52.6) |
| <5                                                           | 14 (63.6)      | 23 (67.7)       | 37 (66.1)       |
| 5-29                                                         | 6 (27.3)       | 10 (29.4)       | 16 (28.6)       |
| >= 30                                                        | 2 (9.1)        | 1 (2.9)         | 3 (5.4)         |
| <b>Platelet count per <math>\mu</math>l</b>                  |                |                 |                 |
| <50                                                          | 7 (31.8)       | 19 (55.9)       | 26 (46.4)       |
| >=50                                                         | 15 (68.2)      | 15 (44.1)       | 30 (53.6)       |
| <b>Serum LDH, U/L</b>                                        |                |                 |                 |
| <300                                                         | 17 (77.3)      | 22 (64.7)       | 39 (69.6)       |
| >=300                                                        | 5 (22.7)       | 12 (35.3)       | 17 (30.4)       |
| <b>Hemoglobin, g/dL</b>                                      |                |                 |                 |
| <8                                                           | 6 (27.3)       | 5 (14.7)        | 11 (19.6)       |
| >= 8                                                         | 16 (72.7)      | 29 (85.3)       | 45 (80.4)       |
| <b>2010 European LeukemiaNet genetic risk classification</b> |                |                 |                 |
| Favorable                                                    | 0 (0.0)        | 2 (5.9)         | 2 (3.6)         |
| Intermediate I                                               | 10 (45.5)      | 12 (35.3)       | 22 (39.3)       |

|                    |              |              |              |
|--------------------|--------------|--------------|--------------|
| Intermediate II    | 7 (31.8)     | 7 (20.6)     | 14 (25)      |
| Adverse            | 3 (13.6)     | 11 (32.4)    | 14 (25)      |
| Not available      | 2 (9.1)      | 2 (5.9)      | 4 (7.1)      |
| <b>BM Blasts %</b> |              |              |              |
| median (range)     | 24.3 (20-30) | 24.8 (20-30) | 24.6 (20-30) |

## Supplementary Table 2

| <b>Response</b> | <b>ATRA (n=22)</b> | <b>No ATRA (n=34)</b> | <b>Total (n=56)</b> |
|-----------------|--------------------|-----------------------|---------------------|
| CR              | 2 (9.1)            | 4 (11.8)              | 6 (10.7)            |
| CRi             | 4 (18.2)           | 3 (8.8)               | 7 (12.5)            |
| PR              | 1 (4.6)            | 0 (0.0)               | 1 (1.8)             |
| ALE             | 4 (18.2)           | 6 (17.7)              | 10 (17.9)           |
| SD              | 6 (27.3)           | 4 (11.8)              | 10 (17.9)           |
| PD              | 5 (22.7)           | 17 (50)               | 22 (39.9)           |

**Supplementary Table 1: Patients and disease characteristics treated with DEC + ATRA (+/- VPA)**

**vs. DEC - ATRA (+/- VPA).** Abbreviations: DEC: decitabine, ATRA: all-*trans* retinoic acid, VPA: valproate, ECOG PS: Eastern Cooperative Oncology Group performance status, AML: acute myeloid leukemia, WBC: white blood cell count, LDH: serum lactate dehydrogenase.

\*: According to the hematopoietic cell transplantation index (HCT-CI)

\*\*: WBC at time of screening prior to cytoreduction as per protocol

**Supplementary Table 2: Responses of patients treated with DEC + ATRA (+/- VPA) or DEC -**

**ATRA (+/- VPA).** Abbreviations: ATRA: all-*trans* retinoic acid, CR: complete response, CRi: complete remission with incomplete hematologic recovery, PR: partial response, ALE: anti-leukemic effect, SD: stable disease.
